# Supplementary material
Source: ML conference proceedings conference paper supplement (https://www.ecva.net/papers/eccv_2022/papers_ECCV/html/136820159_ECCV_2022_paper.php)
Supplement: Supplementary file 1 [file 136820159-supp.pdf]

# SUPPLEMENTARY MATERIAL FOR Disentangling Architecture and Training for Optical Flow

Deqing Sun<sup>\*,†</sup>  Charles Herrmann<sup>\*</sup>  Fitsum Reda   
Michael Rubinstein  David J. Fleet  William T. Freeman  
Google Research

The main paper includes only several examples on the Davis datasets due to space limits. Here we provide more visual examples to more comprehensively evaluate these models visually. We also include screenshots that indicate how our method does on public benchmarks and detailed results on these benchmarks. Throughout the document, we add “-it” to each method to denote our newly trained model, where “it” stands for improved training.

## 1 Screenshots of Public Benchmarks

Evaluation ground truth

All pixels

Evaluation area

All pixels

|                                                                                                                                                                                                                            | Method                         | Setting                                                                                                                                                                 | Code                 | Fl-bg  | Fl-fg   | Fl-all | Density  | Runtime | Environment                    | Compare                  |
|----------------------------------------------------------------------------------------------------------------------------------------------------------------------------------------------------------------------------|--------------------------------|-------------------------------------------------------------------------------------------------------------------------------------------------------------------------|----------------------|--------|---------|--------|----------|---------|--------------------------------|--------------------------|
| 1                                                                                                                                                                                                                          | <a href="#">CamLiFlow</a>      |                                                                                      | <a href="#">code</a> | 2.31 % | 7.04 %  | 3.10 % | 100.00 % | 1.2 s   | GPU @ 2.5 Ghz (Python + C/C++) | <input type="checkbox"/> |
| H. Liu, T. Lu, Y. Xu, J. Liu, W. Li and L. Chen: <a href="#">CamLiFlow: Bidirectional Camera-LiDAR Fusion for Joint Optical Flow and Scene Flow Estimation</a> . CVPR 2022.                                                |                                |                                                                                                                                                                         |                      |        |         |        |          |         |                                |                          |
| 2                                                                                                                                                                                                                          | <a href="#">RigidMask-ISF</a>  |                                                                                      | <a href="#">code</a> | 2.63 % | 7.85 %  | 3.50 % | 100.00 % | 3.3 s   | GPU @ 2.5 Ghz (Python)         | <input type="checkbox"/> |
| G. Yang and D. Ramanan: <a href="#">Learning to Segment Rigid Motions from Two Frames</a> . CVPR 2021.                                                                                                                     |                                |                                                                                                                                                                         |                      |        |         |        |          |         |                                |                          |
| 3                                                                                                                                                                                                                          | <a href="#">DRPC</a>           |                                                                                      |                      | 3.17 % | 8.79 %  | 4.11 % | 100.00 % | 2.7 s   | GPU @ >3.5 Ghz (Python)        | <input type="checkbox"/> |
| 4                                                                                                                                                                                                                          | <a href="#">DIP</a>            |                                                                                                                                                                         |                      | 3.86 % | 5.96 %  | 4.21 % | 100.00 % | 0.15 s  | 1 core @ 2.5 Ghz (Python)      | <input type="checkbox"/> |
| 5                                                                                                                                                                                                                          | <a href="#">RAFT-3D</a>        |                                                                                      |                      | 3.39 % | 8.79 %  | 4.29 % | 100.00 % | 2 s     | GPU @ 2.5 Ghz (Python + C/C++) | <input type="checkbox"/> |
| Z. Teed and J. Deng: <a href="#">RAFT-3D: Scene Flow using Rigid-Motion Embeddings</a> . arXiv preprint arXiv:2012.00726 2020.                                                                                             |                                |                                                                                                                                                                         |                      |        |         |        |          |         |                                |                          |
| 6                                                                                                                                                                                                                          | <a href="#">LPSF</a>           |   |                      | 3.18 % | 9.92 %  | 4.31 % | 100.00 % | 60 s    | 1 core @ 2.5 Ghz (C/C++)       | <input type="checkbox"/> |
| 7                                                                                                                                                                                                                          | <a href="#">RAFT-it</a>        |                                                                                                                                                                         |                      | 4.11 % | 5.34 %  | 4.31 % | 100.00 % | 0.1 s   | GPU @ 2.5 Ghz (Python)         | <input type="checkbox"/> |
| 8                                                                                                                                                                                                                          | <a href="#">SeparableFlow</a>  |                                                                                                                                                                         | <a href="#">code</a> | 4.25 % | 5.92 %  | 4.53 % | 100.00 % | 0.5 s   | GPU                            | <input type="checkbox"/> |
| F. Zhang, O. Woodford, V. Prisacariu and P. Torr: <a href="#">Separable Flow: Learning Motion Cost Volumes for Optical Flow Estimation</a> . Proceedings of the IEEE/CVF International Conference on Computer Vision 2021. |                                |                                                                                                                                                                         |                      |        |         |        |          |         |                                |                          |
| 9                                                                                                                                                                                                                          | <a href="#">MetaFlow</a>       |                                                                                                                                                                         |                      | 4.11 % | 6.77 %  | 4.55 % | 100.00 % | 0.2 s   | 1 core @ 2.5 Ghz (Python)      | <input type="checkbox"/> |
| 10                                                                                                                                                                                                                         | <a href="#">KPA-Flow</a>       |                                                                                                                                                                         |                      | 4.17 % | 6.77 %  | 4.60 % | 100.00 % | 0.2 s   | 1 core @ 2.5 Ghz (Python)      | <input type="checkbox"/> |
| 11                                                                                                                                                                                                                         | <a href="#">RealFlow</a>       |                                                                                                                                                                         |                      | 4.20 % | 6.76 %  | 4.63 % | 100.00 % | 0.2 s   | 8 cores @ 2.5 Ghz (Python)     | <input type="checkbox"/> |
| 12                                                                                                                                                                                                                         | <a href="#">FCTR</a>           |                                                                                                                                                                         |                      | 4.45 % | 5.63 %  | 4.65 % | 100.00 % | 0.2 s   | GPU @ 2.5 Ghz (Python)         | <input type="checkbox"/> |
| 13                                                                                                                                                                                                                         | <a href="#">FlowNAS-RAFT-K</a> |                                                                                                                                                                         |                      | 4.36 % | 6.25 %  | 4.67 % | 100.00 % | 0.19 s  | GPU @ 2.5 Ghz (Python)         | <input type="checkbox"/> |
| 14                                                                                                                                                                                                                         | <a href="#">UberATG-DRISF</a>  |                                                                                      |                      | 3.59 % | 10.40 % | 4.73 % | 100.00 % | 0.75 s  | CPU+GPU @ 2.5 Ghz (Python)     | <input type="checkbox"/> |
| W. Ma, S. Wang, R. Hu, Y. Xiong and R. Urtasun: <a href="#">Deep Rigid Instance Scene Flow</a> . CVPR 2019.                                                                                                                |                                |                                                                                                                                                                         |                      |        |         |        |          |         |                                |                          |
| 15                                                                                                                                                                                                                         | <a href="#">RAFT-A</a>         |                                                                                                                                                                         | <a href="#">code</a> | 4.54 % | 5.99 %  | 4.78 % | 100.00 % | 0.7 s   | GPU @ 2.5 Ghz (Python + C/C++) | <input type="checkbox"/> |
| D. Sun, D. Vlasic, C. Herrmann, V. Jampani, M. Krainin, H. Chang, R. Zabih, W. Freeman and C. Liu: <a href="#">AutoFlow: Learning a Better Training Set for Optical Flow</a> . CVPR 2021.                                  |                                |                                                                                                                                                                         |                      |        |         |        |          |         |                                |                          |

**Fig. 1.** Screenshot of KITTI 2015 public benchmark. We name our newly trained RAFT as RAFT-it, “it” stands for improved training.

Table 1 summarizes the detailed results by previously published and our newly trained models. The newly trained models are more accurate than previ-

<sup>\*</sup>Equal technical contribution, <sup>†</sup>project lead.

|                                       |       |       |        |       |       |       |       |       |       |                                   |
|---------------------------------------|-------|-------|--------|-------|-------|-------|-------|-------|-------|-----------------------------------|
| RAFT-it <sup>[17]</sup>               | 1.554 | 0.612 | 9.242  | 1.664 | 0.514 | 0.273 | 0.287 | 0.971 | 9.261 | <a href="#">Visualize Results</a> |
| RAFTwarm+OBS <sup>[16]</sup>          | 1.593 | 0.600 | 9.692  | 1.532 | 0.507 | 0.309 | 0.300 | 0.989 | 9.470 | <a href="#">Visualize Results</a> |
| RAFTv2-OER-warm-start <sup>[19]</sup> | 1.594 | 0.625 | 9.487  | 1.567 | 0.512 | 0.339 | 0.328 | 1.014 | 9.271 | <a href="#">Visualize Results</a> |
| RAFT <sup>[20]</sup>                  | 1.609 | 0.623 | 9.647  | 1.621 | 0.518 | 0.301 | 0.341 | 1.036 | 9.288 | <a href="#">Visualize Results</a> |
| NASFlow-RAFT <sup>[21]</sup>          | 1.613 | 0.503 | 10.664 | 1.339 | 0.405 | 0.238 | 0.298 | 0.892 | 9.883 | <a href="#">Visualize Results</a> |
| CSFlow-2-view <sup>[22]</sup>         | 1.626 | 0.584 | 10.123 | 1.527 | 0.492 | 0.254 | 0.330 | 1.015 | 9.539 | <a href="#">Visualize Results</a> |
| NASFlow <sup>[23]</sup>               | 1.629 | 0.639 | 9.708  | 1.616 | 0.540 | 0.334 | 0.306 | 1.001 | 9.718 | <a href="#">Visualize Results</a> |
| L2L-Flow-ext-warm <sup>[24]</sup>     | 1.648 | 0.622 | 10.017 | 1.641 | 0.516 | 0.282 | 0.342 | 1.018 | 9.657 | <a href="#">Visualize Results</a> |
| RAFT+NCUP <sup>[25]</sup>             | 1.661 | 0.678 | 9.666  | 1.872 | 0.541 | 0.302 | 0.371 | 1.102 | 9.402 | <a href="#">Visualize Results</a> |

**Fig. 2.** Screenshot of Sintel clean public benchmark. We name our newly trained RAFT as RAFT-it, “it” stands for improved training.

|                               |       |       |        |       |       |       |       |       |        |                                   |
|-------------------------------|-------|-------|--------|-------|-------|-------|-------|-------|--------|-----------------------------------|
| SCAR <sup>[26]</sup>          | 2.882 | 1.391 | 15.038 | 3.101 | 1.145 | 0.773 | 0.651 | 1.759 | 16.665 | <a href="#">Visualize Results</a> |
| C1 <sup>[27]</sup>            | 2.884 | 1.436 | 14.696 | 3.050 | 1.199 | 0.821 | 0.608 | 1.786 | 16.833 | <a href="#">Visualize Results</a> |
| RAFT-it <sup>[28]</sup>       | 2.896 | 1.407 | 15.027 | 2.811 | 1.157 | 0.882 | 0.510 | 1.701 | 17.622 | <a href="#">Visualize Results</a> |
| RFPM <sup>[29]</sup>          | 2.901 | 1.331 | 15.698 | 2.732 | 1.063 | 0.811 | 0.535 | 1.602 | 17.779 | <a href="#">Visualize Results</a> |
| L2L-Flow-ext <sup>[30]</sup>  | 2.954 | 1.392 | 15.684 | 3.059 | 1.158 | 0.822 | 0.649 | 1.823 | 17.125 | <a href="#">Visualize Results</a> |
| FCTR <sup>[31]</sup>          | 2.979 | 1.323 | 16.489 | 2.963 | 1.103 | 0.760 | 0.664 | 1.815 | 17.290 | <a href="#">Visualize Results</a> |
| MF2C <sup>[32]</sup>          | 2.980 | 1.484 | 15.191 | 3.187 | 1.281 | 0.978 | 0.692 | 2.060 | 16.560 | <a href="#">Visualize Results</a> |
| CSFlow-2-view <sup>[33]</sup> | 3.025 | 1.445 | 15.914 | 3.061 | 1.125 | 0.877 | 0.622 | 1.881 | 17.720 | <a href="#">Visualize Results</a> |
| MFFC <sup>[34]</sup>          | 3.029 | 1.517 | 15.363 | 3.135 | 1.189 | 0.916 | 0.621 | 1.812 | 17.929 | <a href="#">Visualize Results</a> |
| RAFT+OBS <sup>[35]</sup>      | 3.104 | 1.487 | 16.286 | 3.107 | 1.153 | 0.964 | 0.657 | 1.940 | 18.061 | <a href="#">Visualize Results</a> |
| RAFT-A <sup>[36]</sup>        | 3.137 | 1.590 | 15.762 | 3.153 | 1.270 | 1.032 | 0.534 | 1.956 | 18.912 | <a href="#">Visualize Results</a> |

**Fig. 3.** Screenshot of Sintel final public benchmark. We name our newly trained RAFT as RAFT-it, “it” stands for improved training. RAFT-it is only slightly worse than SeparableFlow on Sintel.final among all published two-frame methods.

| Optical flow evaluation results                                                                                             |           |                       |      |         |                         |      |         |                            |      | Statistics: Average endpoint SD R0.5 R1.0 R2.0 A50 A75 A95                                                                                                           |                         |      |         |                   |      |         |                   |      |         |                      |      |         |               |      |         |
|-----------------------------------------------------------------------------------------------------------------------------|-----------|-----------------------|------|---------|-------------------------|------|---------|----------------------------|------|----------------------------------------------------------------------------------------------------------------------------------------------------------------------|-------------------------|------|---------|-------------------|------|---------|-------------------|------|---------|----------------------|------|---------|---------------|------|---------|
| Show images: <input checked="" type="radio"/> below table <input type="radio"/> above table <input type="radio"/> in window |           |                       |      |         |                         |      |         |                            |      | Error type: <input checked="" type="radio"/> endpoint <input type="radio"/> angle <input type="radio"/> interpolation <input type="radio"/> normalized interpolation |                         |      |         |                   |      |         |                   |      |         |                      |      |         |               |      |         |
| Average endpoint error                                                                                                      | avg. rank | Army (Hidden texture) |      |         | Mequon (Hidden texture) |      |         | Scheffers (Hidden texture) |      |                                                                                                                                                                      | Wooden (Hidden texture) |      |         | Grove (Synthetic) |      |         | Urban (Synthetic) |      |         | Yosemite (Synthetic) |      |         | Teddy (Sheep) |      |         |
| all                                                                                                                         | all       | all                   | disc | uniflow | all                     | disc | uniflow | all                        | disc | uniflow                                                                                                                                                              | all                     | disc | uniflow | all               | disc | uniflow | all               | disc | uniflow | all                  | disc | uniflow | all           | disc | uniflow |
| RAFT-A [194]                                                                                                                | 1.7       | 0.07                  | 0.21 | 0.05    | 0.15                    | 0.49 | 0.11    | 0.17                       | 0.12 | 0.14                                                                                                                                                                 | 0.05                    | 0.24 | 0.03    | 0.51              | 0.74 | 0.23    | 0.09              | 0.21 | 0.07    | 0.06                 | 0.11 | 0.07    | 0.28          | 0.61 | 0.29    |
| NNF-Local [75]                                                                                                              | 5.8       | 0.07                  | 0.20 | 0.05    | 0.15                    | 0.51 | 0.12    | 0.18                       | 0.37 | 0.14                                                                                                                                                                 | 0.10                    | 0.49 | 0.06    | 0.41              | 0.61 | 0.21    | 0.23              | 0.66 | 0.19    | 0.10                 | 0.16 | 0.12    | 0.15          | 0.17 | 0.28    |
| PMMST [112]                                                                                                                 | 13.3      | 0.09                  | 0.21 | 0.07    | 0.18                    | 0.51 | 0.16    | 0.21                       | 0.42 | 0.17                                                                                                                                                                 | 0.10                    | 0.33 | 0.08    | 0.51              | 0.74 | 0.28    | 0.24              | 0.65 | 0.20    | 0.11                 | 0.33 | 0.12    | 0.15          | 0.17 | 0.28    |
| RAFT-IF_RVC [179]                                                                                                           | 13.3      | 0.10                  | 0.30 | 0.08    | 0.18                    | 0.55 | 0.14    | 0.21                       | 0.43 | 0.19                                                                                                                                                                 | 0.08                    | 0.23 | 0.04    | 0.51              | 0.75 | 0.25    | 0.14              | 0.42 | 0.11    | 0.07                 | 0.12 | 0.15    | 0.08          | 0.27 | 0.28    |
| OTAP [76]                                                                                                                   | 14.5      | 0.08                  | 0.21 | 0.06    | 0.18                    | 0.53 | 0.12    | 0.19                       | 0.37 | 0.14                                                                                                                                                                 | 0.14                    | 0.37 | 0.07    | 0.51              | 0.76 | 0.25    | 0.31              | 0.76 | 0.25    | 0.11                 | 0.33 | 0.12    | 0.15          | 0.21 | 0.33    |
| MDP-Flow2 [68]                                                                                                              | 15.0      | 0.08                  | 0.21 | 0.07    | 0.15                    | 0.48 | 0.11    | 0.20                       | 0.40 | 0.14                                                                                                                                                                 | 0.15                    | 0.80 | 0.08    | 0.63              | 0.83 | 0.43    | 0.26              | 0.76 | 0.23    | 0.11                 | 0.33 | 0.12    | 0.15          | 0.17 | 0.28    |
| NN-field [71]                                                                                                               | 16.4      | 0.08                  | 0.22 | 0.05    | 0.17                    | 0.55 | 0.13    | 0.19                       | 0.39 | 0.15                                                                                                                                                                 | 0.09                    | 0.48 | 0.05    | 0.41              | 0.61 | 0.20    | 0.52              | 0.64 | 0.26    | 0.13                 | 0.33 | 0.13    | 0.17          | 0.20 | 0.27    |
| ComponentFusion [84]                                                                                                        | 19.6      | 0.07                  | 0.21 | 0.08    | 0.16                    | 0.55 | 0.12    | 0.20                       | 0.44 | 0.15                                                                                                                                                                 | 0.11                    | 0.65 | 0.06    | 0.71              | 0.77 | 0.53    | 0.32              | 0.67 | 0.28    | 0.11                 | 0.33 | 0.13    | 0.17          | 0.15 | 0.28    |
| CoT-AMFlow [174]                                                                                                            | 22.4      | 0.08                  | 0.22 | 0.07    | 0.19                    | 0.48 | 0.12    | 0.21                       | 0.45 | 0.15                                                                                                                                                                 | 0.16                    | 0.86 | 0.08    | 0.67              | 0.86 | 0.56    | 0.27              | 0.82 | 0.24    | 0.12                 | 0.33 | 0.12    | 0.15          | 0.18 | 0.28    |
| TCT-Flow [77]                                                                                                               | 26.4      | 0.07                  | 0.21 | 0.05    | 0.19                    | 0.54 | 0.12    | 0.20                       | 0.46 | 0.14                                                                                                                                                                 | 0.14                    | 0.86 | 0.07    | 0.67              | 0.86 | 0.57    | 0.22              | 0.82 | 0.19    | 0.11                 | 0.33 | 0.11    | 0.12          | 0.30 | 0.33    |
| PRAFlow_RVC [177]                                                                                                           | 27.2      | 0.11                  | 0.27 | 0.08    | 0.24                    | 0.64 | 0.19    | 0.28                       | 0.61 | 0.23                                                                                                                                                                 | 0.12                    | 0.82 | 0.06    | 0.60              | 0.87 | 0.38    | 0.18              | 0.50 | 0.16    | 0.07                 | 0.12 | 0.15    | 0.08          | 0.49 | 0.30    |

**Fig. 4.** Screenshot of Middlebury public benchmark (AEPE). We name our newly trained RAFT as RAFT-it, “it” stands for improved training. RAFT-it sets a new state of the art on Middlebury.

ously models regardless of occlusions (unmatched), distance to motion boundaries, and speed.

Table 2 summarizes the detailed results on KITTI for the previously best published and the newly trained models. The newly trained models are generally better than the previously trained models. The only exception is the foreground regions for IRR-PWC. Note that the original IRR-PWC implementation computes bidirectional flow, reasons about occlusions, and uses a bilateral refinement, which may help the foreground objects. Our newly trained IRR-PWC

| Model             | all  | match | unmatch | d0-10 | d10-60 | d60-140 | s0-10 | s10-40 | s40+  |
|-------------------|------|-------|---------|-------|--------|---------|-------|--------|-------|
| PWC-Net           | 4.60 | 2.25  | 23.70   | 4.78  | 2.05   | 1.23    | 0.95  | 2.98   | 26.62 |
| PWC-Net-it (ours) | 3.68 | 1.82  | 18.87   | 3.47  | 1.39   | 1.18    | 0.62  | 1.96   | 23.07 |
| IRR-PWC           | 4.58 | 2.15  | 24.36   | 4.17  | 1.84   | 1.29    | 0.71  | 2.42   | 29.00 |
| IRR-PWC-it (ours) | 3.56 | 1.83  | 17.54   | 3.67  | 1.40   | 1.16    | 0.63  | 2.04   | 21.63 |
| RAFT [1]          | 3.14 | 1.59  | 15.76   | 3.15  | 1.27   | 1.03    | 0.53  | 1.96   | 18.91 |
| RAFT-it (ours)    | 2.90 | 1.41  | 15.03   | 2.81  | 1.16   | 0.88    | 0.51  | 1.70   | 17.62 |

**Table 1.** Detailed analysis of AEPE on Sintel test set. “it” stands for improved training.

is a straightforward modification of PWC-Net and is more lightweight without these sophisticated modules.

| Model             | All    |        |        | Occ    |        |        |
|-------------------|--------|--------|--------|--------|--------|--------|
|                   | F1-bg  | F1-fg  | F1-all | F1-bg  | F1-fg  | F1-all |
| PWC-Net [2]       | 9.66 % | 9.31 % | 9.60 % | 6.14 % | 5.98 % | 6.12 % |
| PWC-Net [3]       | 7.69 % | 7.88 % | 7.72 % | 4.91 % | 4.88 % | 4.91 % |
| PWC-Net-it (ours) | 5.18 % | 7.36 % | 5.54 % | 3.41 % | 4.90 % | 3.68 % |
| IRR-PWC           | 7.68 % | 7.52 % | 7.65 % | 4.92 % | 4.62 % | 4.86 % |
| IRR-PWC-it (ours) | 5.12 % | 8.82 % | 5.73 % | 3.47 % | 5.95 % | 3.92 % |
| RAFT [4]          | 4.74 % | 6.87 % | 5.10 % | 2.87 % | 3.98 % | 3.07 % |
| RAFT [1]          | 4.54 % | 5.99 % | 4.78 % | 3.01 % | 3.17 % | 3.04 % |
| RAFT-it (ours)    | 4.11 % | 5.34 % | 4.31 % | 2.68 % | 2.77 % | 2.70 % |

**Table 2.** Detailed performance on KITTI 2015 test set. “it” stands for improved training.

## 2 More Visual Comparisons

### 2.1 PWC-it, IRR-it, and RAFT-it on Davis 2K

In this subsection, we include 4 examples of our improved training models on Davis 2K images: Figures 5, 6, 7, and 8.

### 2.2 PWC-it, IRR-it, and RAFT-it (down-up) on Davis 4K

In this subsection, we include 4 examples of our improved training models on Davis 4K images: Figures 9, 10, 11, and 12. Note that due to memory constraints, RAFT-it requires the input to be downsampled and then the output flow to be upsampled to 4K.

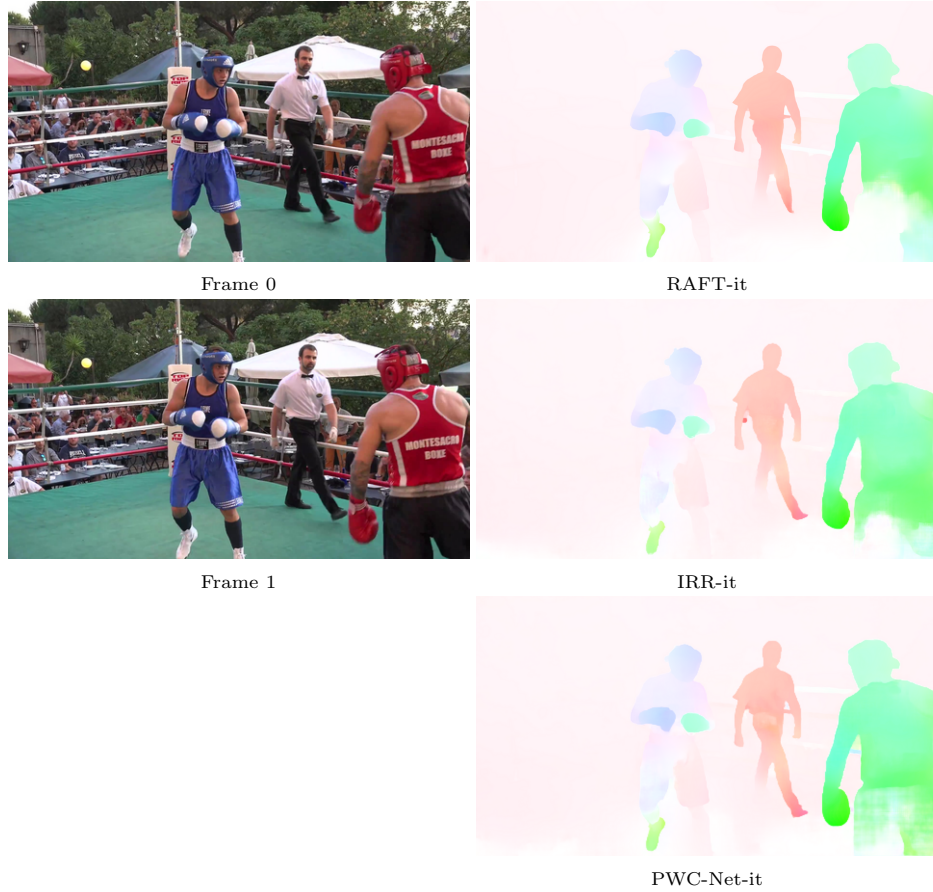

**Fig. 5.** PWC-it, IRR-it, and RAFT-it on Davis 2K images.

### 2.3 Old vs New for PWC and RAFT on Davis 448x864

In this subsection, we include 8 examples of two-frame optical flow from PWC-original, RAFT-original, PWC-it, and RAFT-it evaluated on Davis images with resolution 448 by 864: Figures 13.

### 2.4 Old vs New for PWC and RAFT on Viper 1080x1920

In this subsection, we include 3 examples of two-frame optical flow from PWC-original, RAFT-original, PWC-it, and RAFT-it evaluated on Viper validation images with resolution 1080 by 1920: Figures 14.



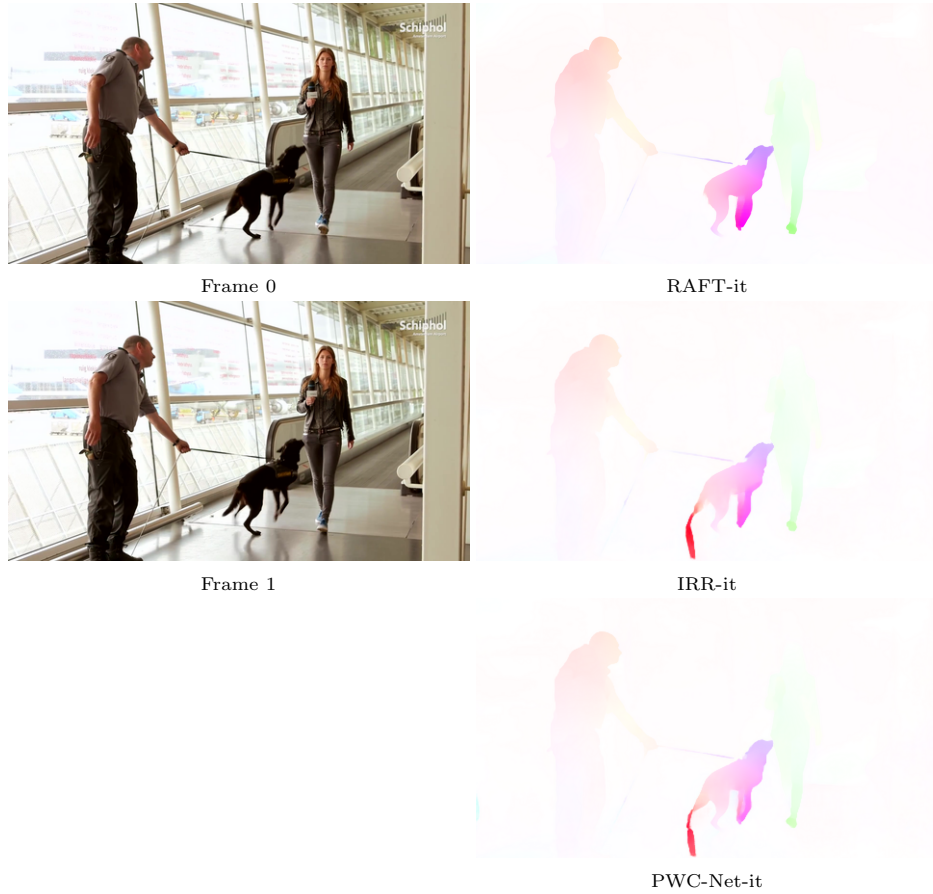

**Fig. 6.** PWC-it, IRR-it, and RAFT-it on Davis 2K images.

## References

1. Sun, D., Vlasic, D., Herrmann, C., Jampani, V., Krainin, M., Chang, H., Zabih, R., Freeman, W.T., Liu, C.: Autoflow: Learning a better training set for optical flow. In: CVPR (2021)
2. Sun, D., Yang, X., Liu, M.Y., Kautz, J.: Pwc-net: Cnns for optical flow using pyramid, warping, and cost volume. In: CVPR (June 2018)
3. Sun, D., Yang, X., Liu, M.Y., Kautz, J.: Models matter, so does training: An empirical study of cnns for optical flow estimation. IEEE TPAMI (2019)
4. Teed, Z., Deng, J.: RAFT: Recurrent all-pairs field transforms for optical flow. In: Proc. ECCV (2020)

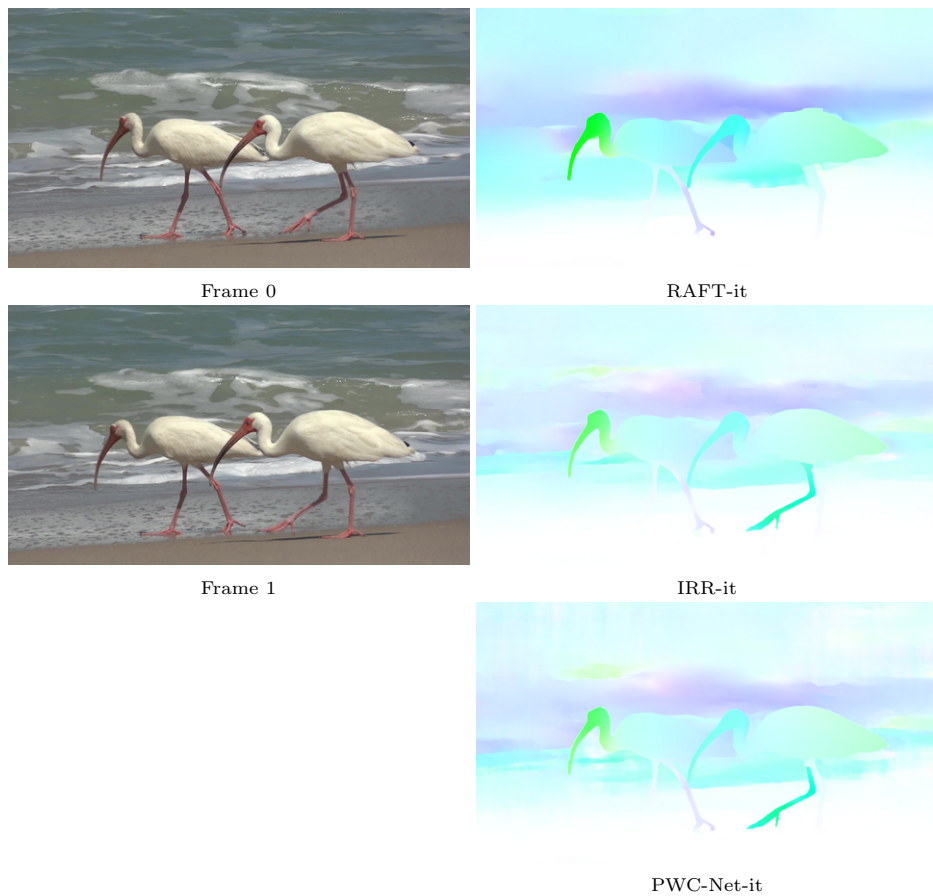

**Fig. 7.** PWC-it, IRR-it, and RAFT-it on Davis 2K images.

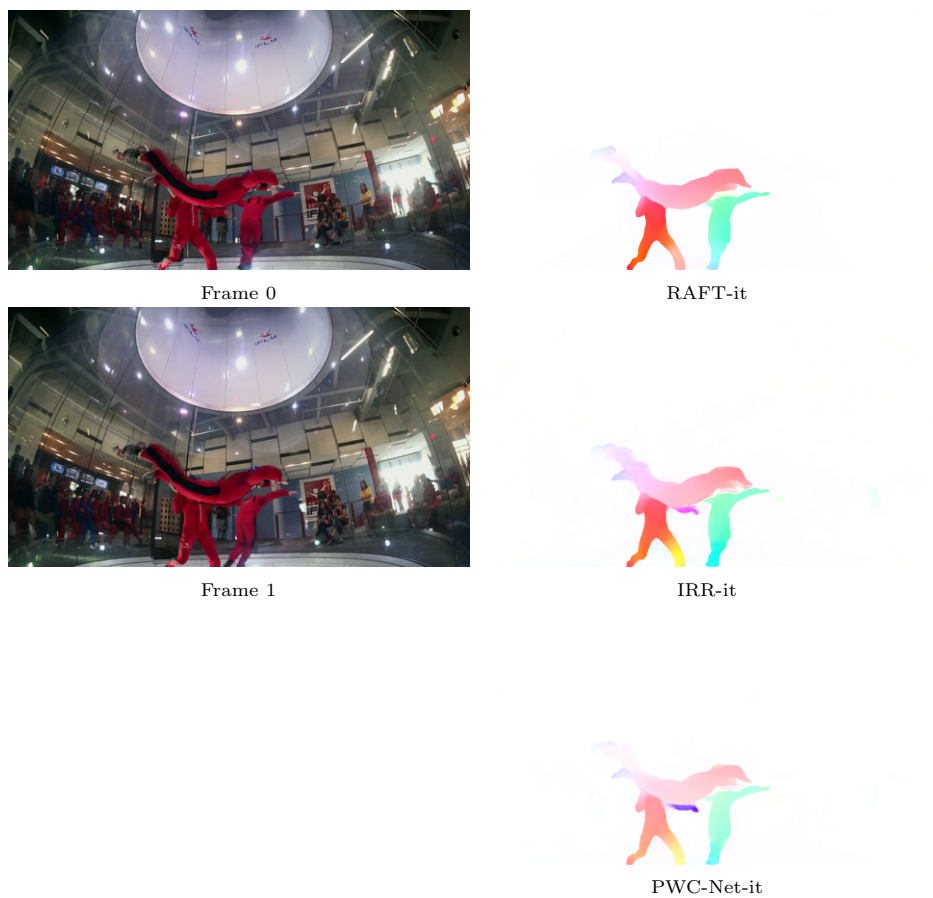

**Fig. 8.** PWC-it, IRR-it, and RAFT-it on Davis 2K images.

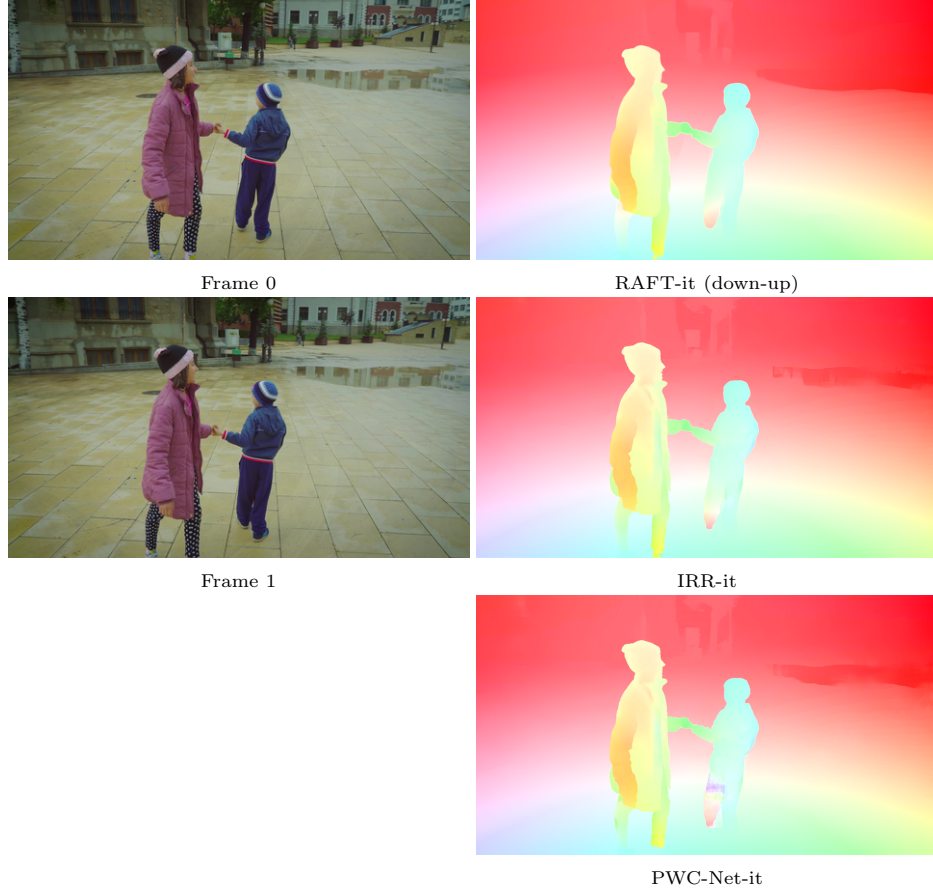

**Fig. 9.** PWC-it, IRR-it, and RAFT-it (down-up) on Davis 4K images. Note that RAFT-it requires the input images to be downsampled due to memory requirements and then the flow upsampled. Note the higher level of detail in IRR-it and PWC-Net-it: the clothes on the person on the left.

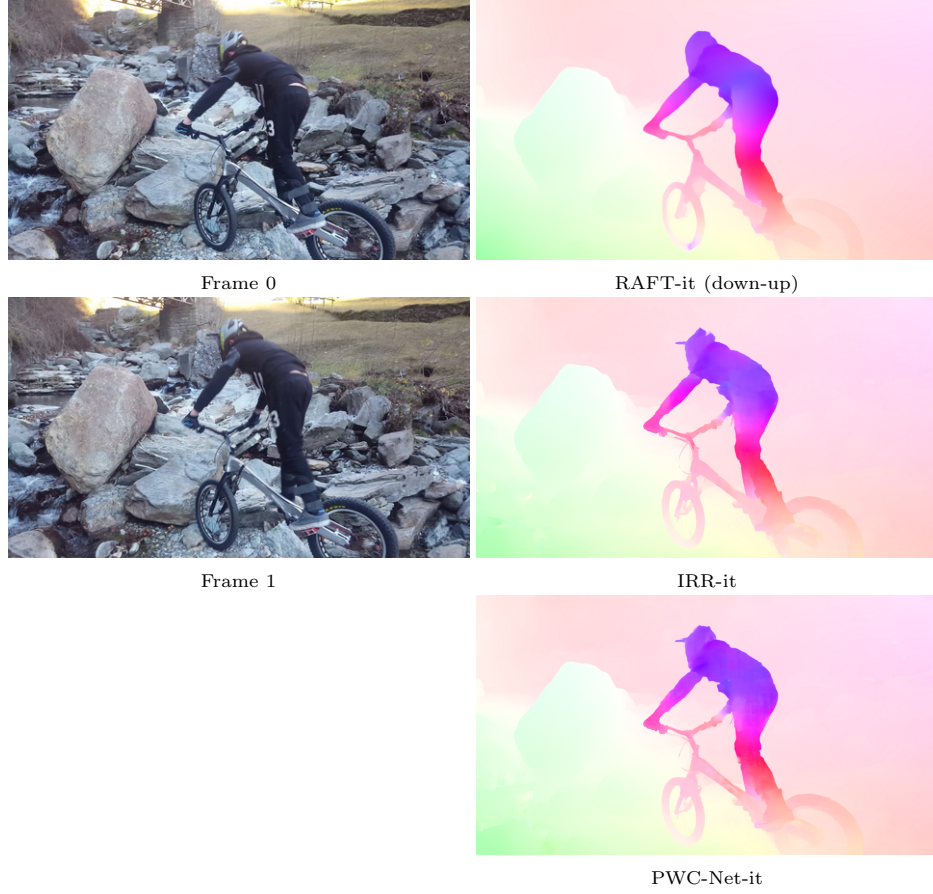

**Fig. 10.** PWC-it, IRR-it, and RAFT-it (down-up) on Davis 4K images. Note that RAFT-it requires the input images to be downsampled due to memory requirements and then the flow upsampled. Note the higher level of detail in IRR-it and PWC-Net-it: the biker's brim, the pant leg, etc.

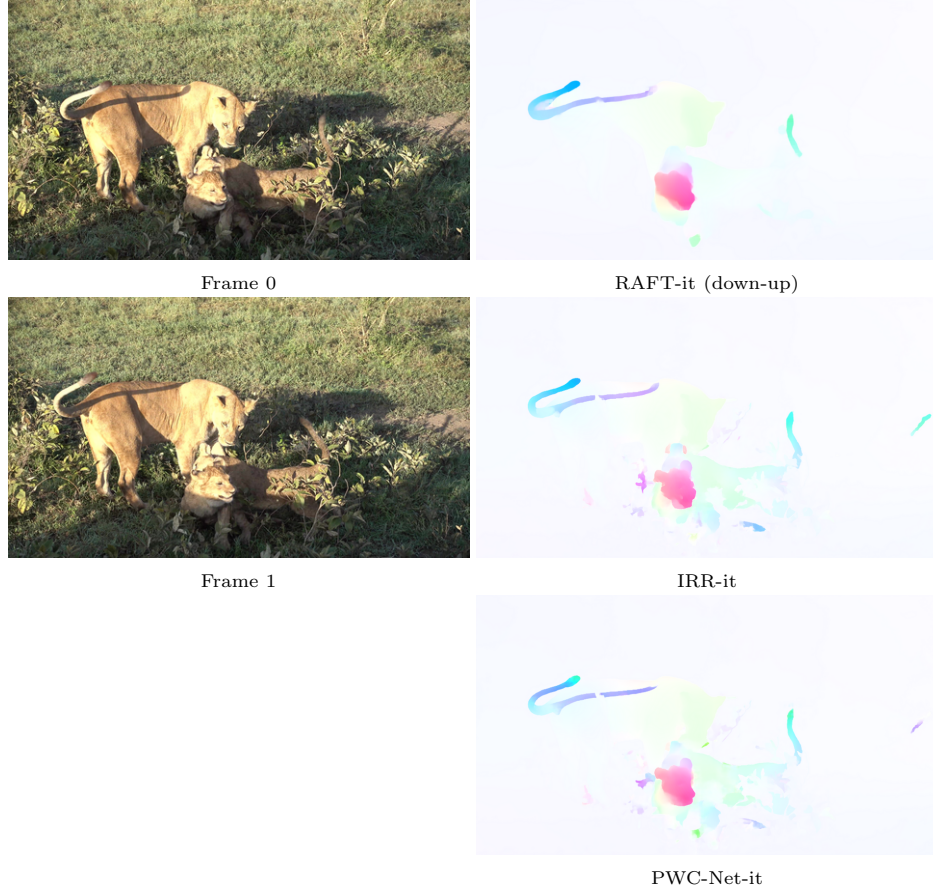

**Fig. 11.** PWC-it, IRR-it, and RAFT-it (down-up) on Davis 4K images. Note that RAFT-it requires the input images to be downsampled due to memory requirements and then the flow upsampled. Note the higher level of detail in IRR-it and PWC-Net-it: plant in front of the front lion.



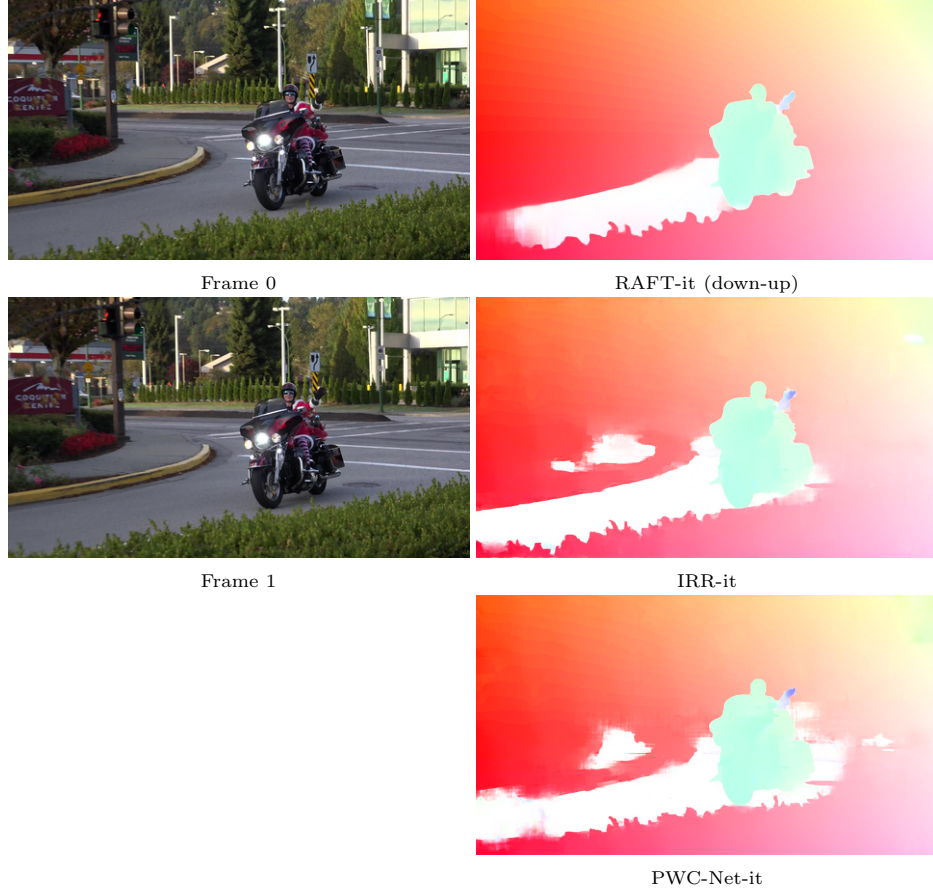

**Fig. 12.** PWC-it, IRR-it, and RAFT-it (down-up) on Davis 4K images. Note that RAFT-it requires the input images to be downsampled due to memory requirements and then the flow upsampled. Note the higher level of detail in IRR-it and PWC-Net-it: the plants in the foreground.

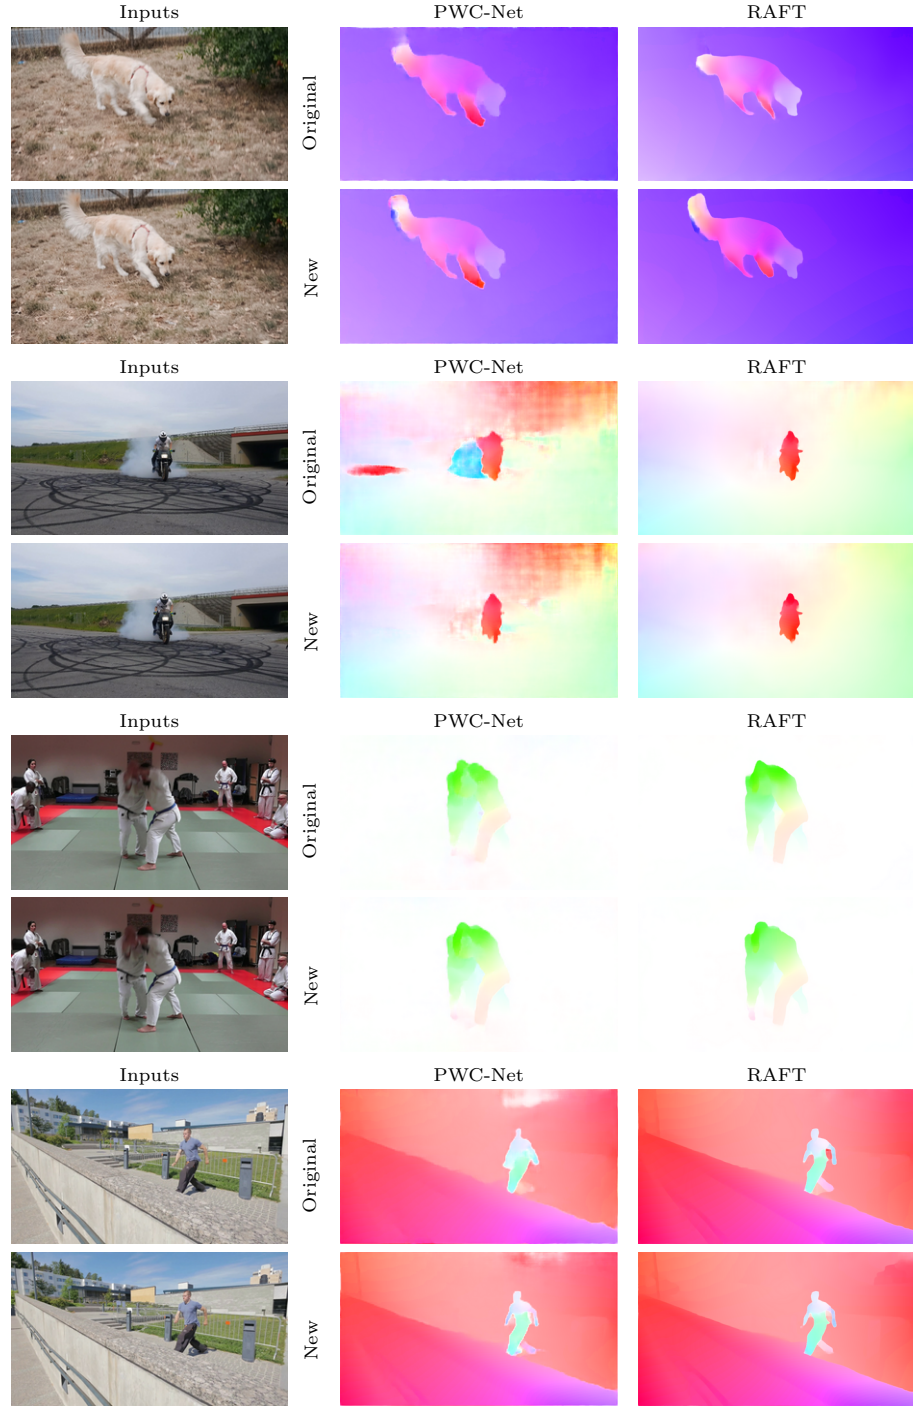

**Fig. 13.** PWC-orig, RAFT-orig vs PWC-it, RAFT-it on Davis 448x864



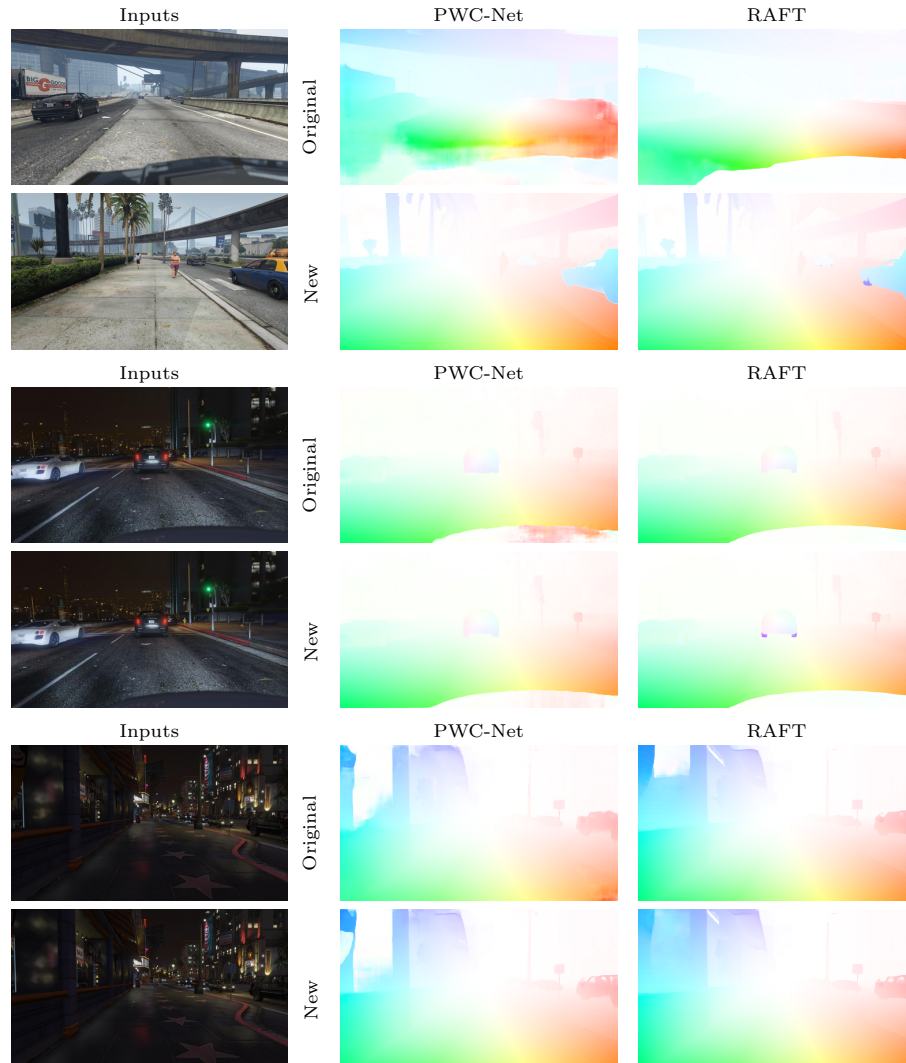

**Fig. 14.** PWC-orig, RAFT-orig vs PWC-it, RAFT-it on Viper 1080x1920
